# Supplementary material for: Synergistic interface between metal Cu nanoparticles and CoO for highly efficient hydrogen production from ammonia borane
Source: Royal Society of Chemistry journal article supplement (doi:10.1039/d3ra01265d), 2023-01-01
Supplement: d3ra01265d1.pdf [file d3ra01265d1.pdf]

## Supporting Information

### Synergetic interface between metal Cu nanoparticles and CoO for highly efficient hydrogen production from ammonia-borane

Hongmei Li, Wenxue He, Liuxin Xu, Ya Pan, Ruichao Xu, Zhihu Sun\*, and Shiqiang Wei

*National Synchrotron Radiation Laboratory, University of Science and Technology of China, Hefei 230029, P. R. China.*

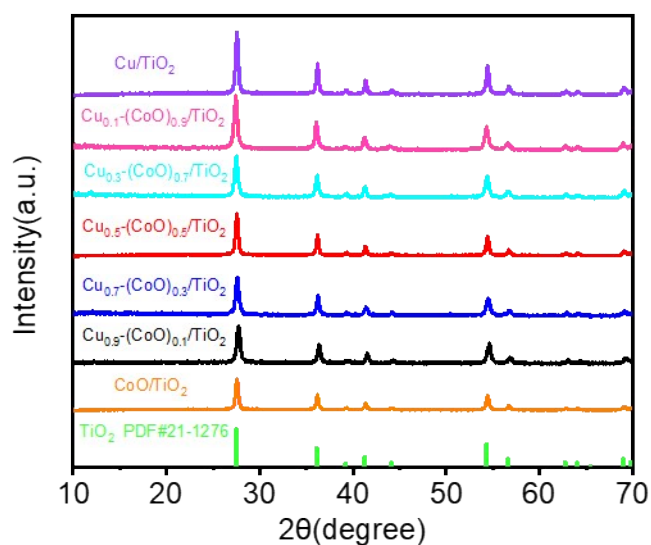

**Figure S1.** XRD patterns of different catalysts.

---

\*Corresponding author. Email: zhsun@ustc.edu.cn.

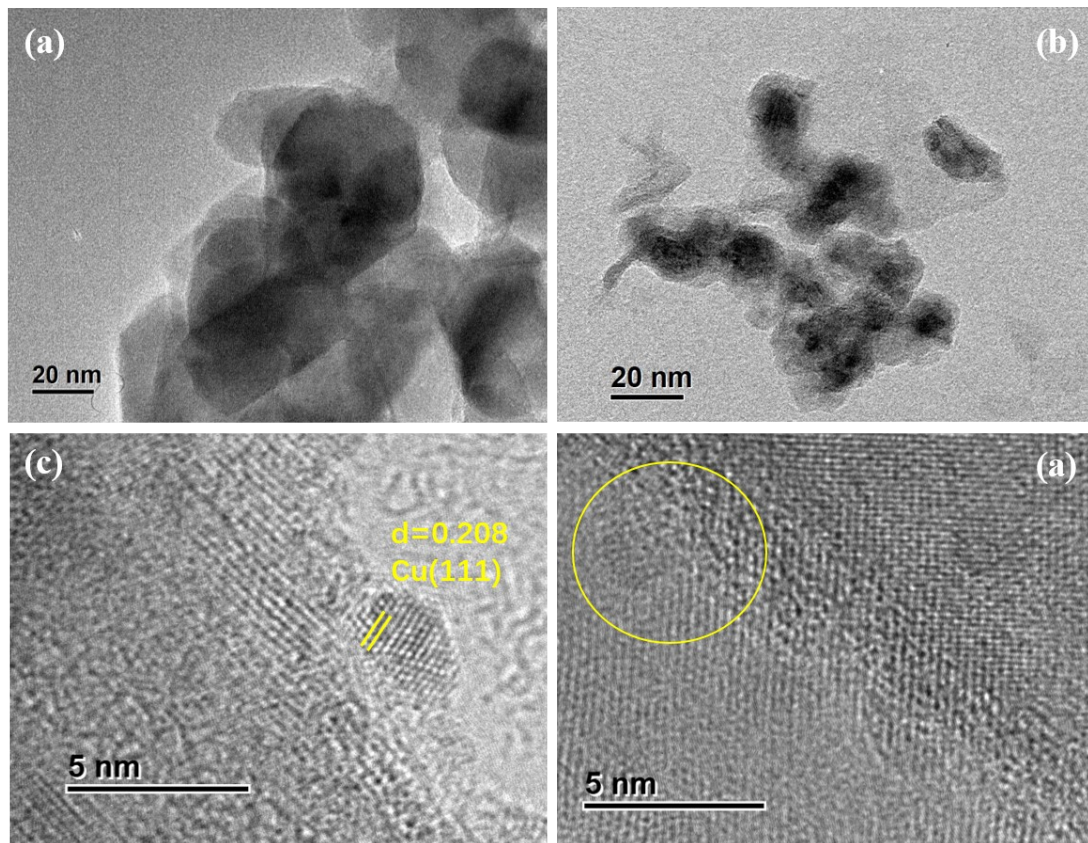

**Figure S2.** TEM images of (a)  $\text{TiO}_2$  and (b)  $\text{Cu}_{0.5}\text{-(CoO)}_{0.5}$ . HRTEM images of (c)  $\text{Cu/TiO}_2$  and (d)  $\text{CoO/TiO}_2$ .

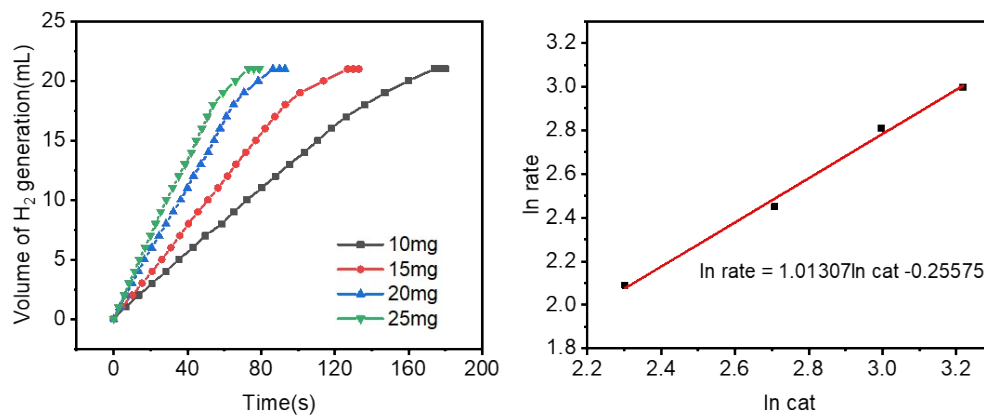

**Figure S3.** Hydrogen production over time for the hydrolysis of ammonia borane catalyzed by  $\text{Cu}_{0.5}\text{-(CoO)}_{0.5}/\text{TiO}_2$  at different catalysts amounts (left), and the relationships between the H<sub>2</sub> generation rate and catalysts amounts in natural logarithmic scale (right).

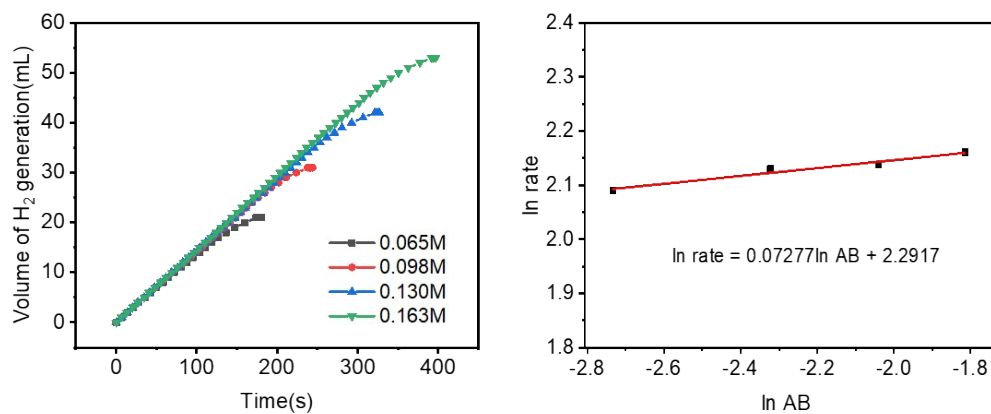

**Figure S4.** Hydrogen production over time for the hydrolysis of ammonia borane catalyzed by  $\text{Cu}_{0.5}\text{-(CoO)}_{0.5}/\text{TiO}_2$  at different ammonia borane concentrations (left), and the relationships between the H<sub>2</sub> generation rate and ammonia borane concentrations in natural logarithmic scale (right).

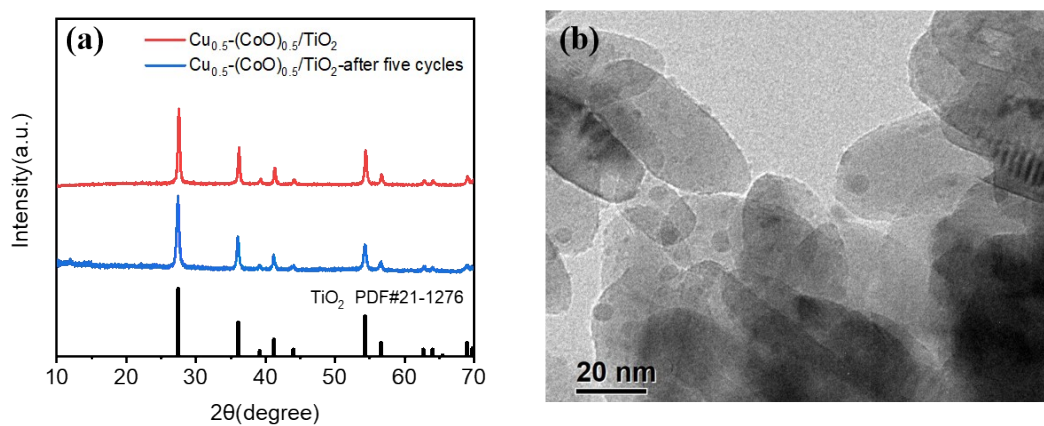

**Figure S5.** The (a) XRD patterns and (b) TEM images of  $\text{Cu}_{0.5}\text{-(CoO)}_{0.5}\text{/TiO}_2$  after five cycles.

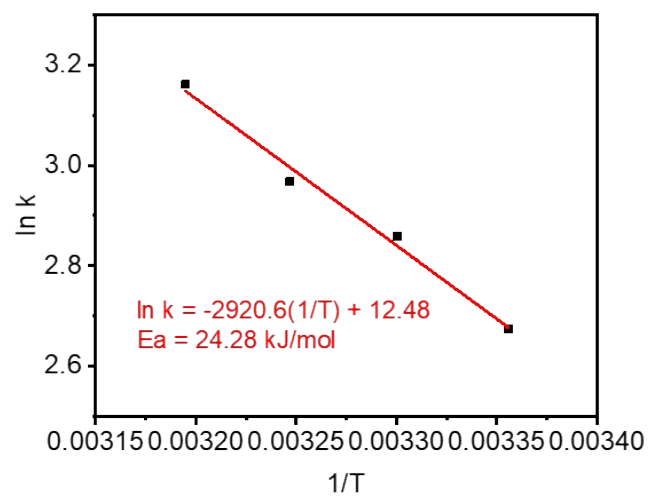

**Figure S6.** The Arrhenius plot and the  $E_a$  of  $\text{Cu}_{0.5}\text{-(CoO)}_{0.5}/\text{TiO}_2$  for hydrolysis of ammonia borane in 0.2 M NaOH within the temperature range from 298 to 313 K.

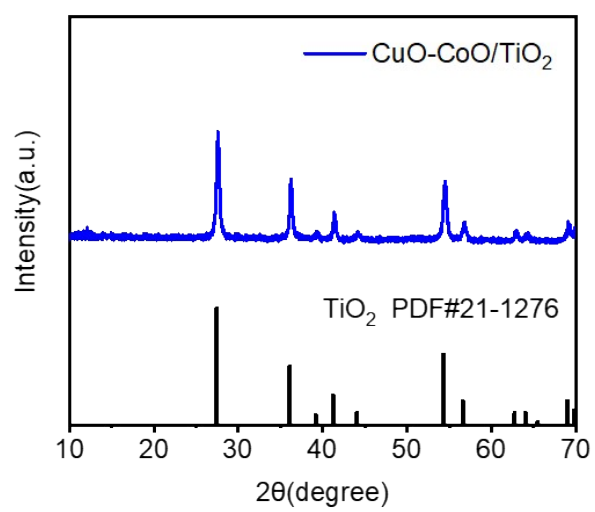

**Figure S7.** XRD pattern of CuO-CoO/TiO<sub>2</sub>.

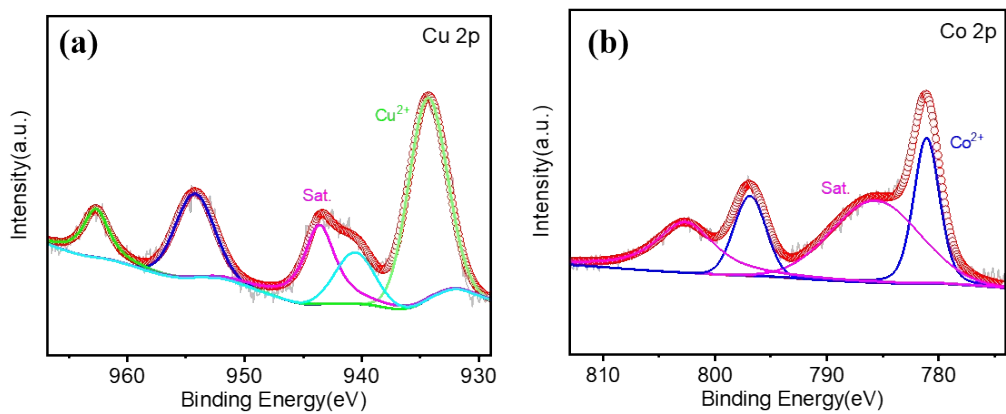

**Figure S8.** The high-resolution XPS spectra of (a) Cu 2p and (b) Co 2p of CuO-CoO/TiO<sub>2</sub>.



**Table S1.** The content of Co and Cu in samples by ICP-AES.

| Sample                                                    | Cu (wt%) | Co (wt%) |
|-----------------------------------------------------------|----------|----------|
| CoO/TiO <sub>2</sub>                                      | 0        | 5.0      |
| Cu <sub>0.1</sub> -(CoO) <sub>0.9</sub> /TiO <sub>2</sub> | 0.6      | 4.6      |
| Cu <sub>0.3</sub> -(CoO) <sub>0.7</sub> /TiO <sub>2</sub> | 1.8      | 3.6      |
| Cu <sub>0.5</sub> -(CoO) <sub>0.5</sub> /TiO <sub>2</sub> | 2.9      | 2.5      |
| Cu <sub>0.7</sub> -(CoO) <sub>0.3</sub> /TiO <sub>2</sub> | 4.4      | 1.7      |
| Cu <sub>0.9</sub> -(CoO) <sub>0.1</sub> /TiO <sub>2</sub> | 5.6      | 0.6      |
| Cu/TiO <sub>2</sub>                                       | 5.7      | 0        |
| CuO-CoO/TiO <sub>2</sub>                                  | 3.0      | 2.7      |
| Cu/TiO <sub>2</sub> + CoO/TiO <sub>2</sub>                | 2.9      | 2.5      |
| Cu <sub>0.5</sub> -(CoO) <sub>0.5</sub>                   | 46.1     | 36.2     |

**Table S2.** TOF values of different catalysts.

| Catalysts                                          | TOF ( $\text{mol}_{\text{H}_2} \text{mol}_{\text{metal}}^{-1} \text{min}^{-1}$ ) |
|----------------------------------------------------|----------------------------------------------------------------------------------|
| $\text{Cu}_{0.1}\text{-(CoO)}_{0.9}/\text{TiO}_2$  | 14.9                                                                             |
| $\text{Cu}_{0.3}\text{-(CoO)}_{0.7}/\text{TiO}_2$  | 23.4                                                                             |
| $\text{Cu}_{0.5}\text{-(CoO)}_{0.5}/\text{TiO}_2$  | 40.8                                                                             |
| $\text{Cu}_{0.7}\text{-(CoO)}_{0.3}/\text{TiO}_2$  | 20.3                                                                             |
| $\text{Cu}_{0.9}\text{-(CoO)}_{0.1}/\text{TiO}_2$  | 16.2                                                                             |
| $\text{CoO}/\text{TiO}_2$                          | 0.0                                                                              |
| $\text{Cu}/\text{TiO}_2$                           | 1.0                                                                              |
| $\text{CuO-CoO}/\text{TiO}_2$                      | 19.0                                                                             |
| $\text{Cu}/\text{TiO}_2 + \text{CoO}/\text{TiO}_2$ | 9.9                                                                              |
| $\text{Cu}_{0.5}\text{-(CoO)}_{0.5}$               | 2.4                                                                              |

**Table S3.** TOF values of different non-noble metal catalysts reported in the literature.

| Catalysts                                                  | TOF ( $\text{mol}_{\text{H}_2} \text{mol}_{\text{metal}}^{-1} \text{min}^{-1}$ ) | T (K) | Ref.      |
|------------------------------------------------------------|----------------------------------------------------------------------------------|-------|-----------|
| $\text{Cu}_{0.72}\text{Co}_{0.18}\text{Mo}_{0.1}$ NPs      | 119.0 <sup>a</sup>                                                               | 298   | 1         |
| $\text{Cu}_{0.5}\text{-(CoO)}_{0.5}/\text{TiO}_2$          | 104.0 <sup>a</sup>                                                               | 298   | This work |
| $\text{Cu@CuCoO}_x$                                        | 98.2 <sup>a</sup>                                                                | 298   | 2         |
| Ni/ZIF-8                                                   | 85.7 <sup>a</sup>                                                                | 298   | 3         |
| $\text{CuO-NiO/Co}_3\text{O}_4$                            | 79.1 <sup>a</sup>                                                                | 298   | 4         |
| $\text{Cu-Ni-Co@MIL-101}$                                  | 72.1                                                                             | 298   | 5         |
| $\text{Cu}_{0.8}\text{Co}_{0.2}\text{O-GO}$                | 70                                                                               | 298   | 6         |
| $\text{Cu}_{0.6}\text{Co}_{0.4}\text{O@CN}$                | 57.7 <sup>a</sup>                                                                | 298   | 7         |
| $\text{Cu/Cu}_{0.76}\text{Co}_{2.24}\text{O}_4\text{-V60}$ | 50.33 <sup>a</sup>                                                               | 298   | 8         |
| $\text{Cu}_{0.5}\text{-(CoO)}_{0.5}/\text{TiO}_2$          | 40.8                                                                             | 298   | This work |
| $\text{CoCuO@CoCu-C}$                                      | 38 <sup>a</sup>                                                                  | 298   | 9         |
| $\text{CuNi/Co}_3\text{O}_4$                               | 31.5 <sup>a</sup>                                                                | 298   | 10        |
| $\text{Cu}_{0.5}\text{Co}_{0.5}/\text{PDDA-HNT}$           | 30.8                                                                             | 298   | 11        |
| $\text{Ni@MSC-30}$                                         | 30.7                                                                             | 298   | 12        |
| $\text{CoCu/Ni}$                                           | 30.5 <sup>a</sup>                                                                | 298   | 13        |
| $\text{Ni}_{0.9}\text{Mo}_{0.1}$ NPs                       | 27.3                                                                             | 298   | 14        |
| $\text{MoO}_3\text{-doped MnCo}_2\text{O}_4$               | 26.4 <sup>a</sup>                                                                | 298   | 15        |
| $\text{Ni}_{0.75}\text{Cu}_{0.25}/47\text{-SiO}_2$         | 25.3                                                                             | 298   | 16        |
| $\text{Co@Ni-MOF NCA}$                                     | 20.54                                                                            | 298   | 17        |
| $\text{CuCo NPs@MIL-101}$                                  | 19.6                                                                             | 298   | 18        |
| $\text{Co}_{40}\text{Cu}_{60}\text{@S16LC-20}$             | 16.36                                                                            | 298   | 19        |
| $\text{Co/CoFeO}_x\text{-25}$                              | 12.25                                                                            | 298   | 20        |
| $\text{CuCo NPs/graphene}$                                 | 9.18                                                                             | 298   | 21        |
| $\text{Cu}_{0.4}\text{Co}_{0.6}$ NPs/BNNFs                 | 8.42                                                                             | 298   | 22        |
| $\text{Co@N-C-700}$                                        | 5.6                                                                              | 298   | 23        |

<sup>a</sup>The reaction was tested in the presence of NaOH.

**Table S4.** The area and proportion of each atom measured by XPS of CuO-CoO/TiO<sub>2</sub>.

| Name  | Area (P)  | Atomic percentage (%) |
|-------|-----------|-----------------------|
| Cl 2p | 693.73    | 0.2                   |
| Ti 2p | 187515.12 | 25.9                  |
| O 1s  | 211056.32 | 67.3                  |
| Co 2p | 72649.99  | 4.1                   |
| Cu 2p | 58021.11  | 2.5                   |

## REFERENCES

1. Q. Yao, K. Yang, X. Hong, X. Chen and Z.-H. Lu, *Catal. Sci. Technol.*, 2018, **8**, 870-877.
2. J. Li, X. Ren, H. Lv, Y. Wang, Y. Li and B. Liu, *J Hazard Mater*, 2020, **391**, 122199.
3. C. Wang, J. Tuninetti, Z. Wang, C. Zhang, R. Ciganda, L. Salmon, S. Moya, J. Ruiz and D. Astruc, *J Am Chem Soc*, 2017, **139**, 11610-11615.
4. J. Liao, Y. Feng, W. Lin, X. Su, S. Ji, L. Li, W. Zhang, B. G. Pollet and H. Li, *Int. J. Hydrogen Energy*, 2020, **45**, 8168-8176.
5. Z. Liang, X. Xiao, X. Yu, X. Huang, Y. Jiang, X. Fan and L. Chen, *J. Alloys Compd.*, 2018, **741**, 501-508.
6. K. Feng, J. Zhong, B. Zhao, H. Zhang, L. Xu, X. Sun and S. T. Lee, *Angew Chem Int Ed Engl*, 2016, **55**, 11950-11954.
7. W. Xu, S. Zhang, R. Shen, Z. Peng, B. Liu, J. Li, Z. Zhang and B. Li, *Energy & Environmental Materials*, 2022, DOI: 10.1002/eem2.12279.
8. C. Wang, Y. Ren, J. Zhao, S. Sun, X. Du, M. Wang, G. Ma, H. Yu, L. Li, X. Yu, X. Zhang, Z. Lu and X. Yang, *Applied Catalysis B: Environmental*, 2022, **314**, 121494.
9. S. Guan, Y. Guo, H. Zhang, X. Liu, Y. Fan and B. Liu, *Sustain Energy Fuels*, 2022, **6**, 1753-1761.
10. J. Zhou, X. Feng, Y. Zhao, R. Cui, D. Wang and B. Zhang, *J. Alloys Compd.*, 2022, **923**, 166345.
11. Y. Liu, J. Zhang, H. Guan, Y. Zhao, J.-H. Yang and B. Zhang, *Appl. Surf. Sci.*, 2018, **427**, 106-113.
12. P. Z. Li, A. Aijaz and Q. Xu, *Angew Chem Int Ed Engl*, 2012, **51**, 6753-6756.
13. J. Liao, F. Lv, Y. Feng, S. Zhong, X. Wu, X. Zhang, H. Wang, J. Li and H. Li, *Catal. Commun.*, 2019, **122**, 16-19.
14. K. Yang, Q. Yao, W. Huang, X. Chen and Z.-H. Lu, *Int. J. Hydrogen Energy*, 2017, **42**, 6840-6850.
15. D. Lu, Y. Feng, Z. Ding, J. Liao, X. Zhang, H. R. Liu and H. Li, *Nanomaterials(Basel)*, 2019, **9**, 1112.
16. K. Guo, Y. Ding, J. Luo, M. Gu and Z. Yu, *ACS Appl. Energy Mater.*, 2019, **2**, 5851-5861.
17. D. R. Kumar, S. Prabu, K. Y. Chiang and T. H. Oh, *Int. J. Energy Res.*, 2022, **46**, 18134-18145.
18. J. Li, Q.-L. Zhu and Q. Xu, *Catal. Sci. Technol.*, 2015, **5**, 525-530.
19. J. R. Deka, D. Saikia, N.-F. Lu, K.-T. Chen, H.-M. Kao and Y.-C. Yang, *Appl. Surf. Sci.*, 2021, **538**, 148091.
20. J. Wang, Y. Chen, S. Guan, J. Shi, M. Li and B. Liu, *Journal of Alloys and Compounds*, 2022, **913**, 165215.
21. J.-M. Yan, Z.-L. Wang, H.-L. Wang and Q. Jiang, *Journal of Materials Chemistry*, 2012, **22**, 10990.
22. X. Yang, Q. Li, L. Li, J. Lin, X. Yang, C. Yu, Z. Liu, Y. Fang, Y. Huang and C. Tang, *J. Power Sources*, 2019, **431**, 135-143.
23. H. Wang, Y. Zhao, F. Cheng, Z. Tao and J. Chen, *Catal. Sci. Technol.*, 2016, **6**, 3443-3448.
